# Supplementary figures and images for: Synthesis of a series of 4-pyridyl-1,2,4-triazole-containing cadmium(ii) luminescent complexes
Source: Royal Society of Chemistry journal article supplement (doi:10.1039/b508332j), 2005-11-14

## Supporting Figures

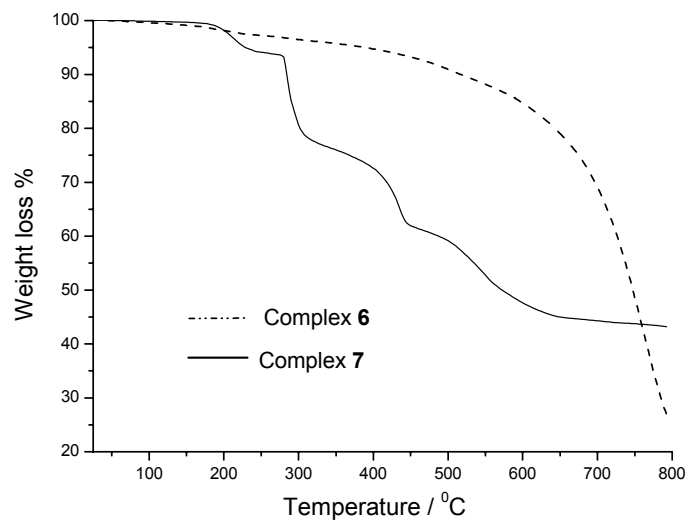

**Figure S1.** TGA plot of **6** and **7**.

Supplement: b508332j.pdf [file b508332j.pdf]
